# Supplementary material for: Dried, closed-path eddy covariance method for measuring carbon dioxide flux over sea ice
Source: Copernicus journal article supplement (doi:10.5194/amt-11-6075-2018), 2018-11-09
Supplement: Supplementary file [file amt-11-6075-2018-supplement-title-page.pdf › amt-11-6075-2018-supplement-title-page.pdf]

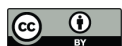

## *Supplement of*

# **Dried, closed-path eddy covariance method for measuring carbon dioxide flux over sea ice**

**Brian J. Butterworth and Brent G. T. Else**

*Correspondence to:* Brian J. Butterworth ([brian.butterworth@ucalgary.ca](mailto:brian.butterworth@ucalgary.ca))

- [amt-11-6075-2018-supplement-title-page.pdf](#)
- [supplement](#)
  - [.DS\\_Store](#)
  - [island360.mp4](#)
  - [supplement.pdf](#)

The copyright of individual parts of the supplement might differ from the CC BY 4.0 License.
